# Supplementary material for: Neoadjuvant pembrolizumab, dabrafenib and trametinib in BRAFV600-mutant resectable melanoma: the randomized phase 2 NeoTrio trial
Source: PubMed Central journal article supplement (PMC11405264; doi:10.1038/s41591-024-03077-5), 2024-06-21
Supplement: 41591_2024_3077_MOESM2_ESM.pdf [file 41591_2024_3077_MOESM2_ESM.pdf]

## Reporting Summary

Nature Portfolio wishes to improve the reproducibility of the work that we publish. This form provides structure for consistency and transparency in reporting. For further information on Nature Portfolio policies, see our [Editorial Policies](#) and the [Editorial Policy Checklist](#).

### Statistics

For all statistical analyses, confirm that the following items are present in the figure legend, table legend, main text, or Methods section.

- | n/a                                 | Confirmed                                                                                                                                                                                                                                                                                      |
|-------------------------------------|------------------------------------------------------------------------------------------------------------------------------------------------------------------------------------------------------------------------------------------------------------------------------------------------|
| <input type="checkbox"/>            | <input checked="" type="checkbox"/> The exact sample size ( $n$ ) for each experimental group/condition, given as a discrete number and unit of measurement                                                                                                                                    |
| <input checked="" type="checkbox"/> | <input type="checkbox"/> A statement on whether measurements were taken from distinct samples or whether the same sample was measured repeatedly                                                                                                                                               |
| <input type="checkbox"/>            | <input checked="" type="checkbox"/> The statistical test(s) used AND whether they are one- or two-sided<br><i>Only common tests should be described solely by name; describe more complex techniques in the Methods section.</i>                                                               |
| <input type="checkbox"/>            | <input checked="" type="checkbox"/> A description of all covariates tested                                                                                                                                                                                                                     |
| <input type="checkbox"/>            | <input checked="" type="checkbox"/> A description of any assumptions or corrections, such as tests of normality and adjustment for multiple comparisons                                                                                                                                        |
| <input type="checkbox"/>            | <input checked="" type="checkbox"/> A full description of the statistical parameters including central tendency (e.g. means) or other basic estimates (e.g. regression coefficient) AND variation (e.g. standard deviation) or associated estimates of uncertainty (e.g. confidence intervals) |
| <input type="checkbox"/>            | <input checked="" type="checkbox"/> For null hypothesis testing, the test statistic (e.g. $F$ , $t$ , $r$ ) with confidence intervals, effect sizes, degrees of freedom and $P$ value noted<br><i>Give <math>P</math> values as exact values whenever suitable.</i>                            |
| <input checked="" type="checkbox"/> | <input type="checkbox"/> For Bayesian analysis, information on the choice of priors and Markov chain Monte Carlo settings                                                                                                                                                                      |
| <input checked="" type="checkbox"/> | <input type="checkbox"/> For hierarchical and complex designs, identification of the appropriate level for tests and full reporting of outcomes                                                                                                                                                |
| <input checked="" type="checkbox"/> | <input type="checkbox"/> Estimates of effect sizes (e.g. Cohen's $d$ , Pearson's $r$ ), indicating how they were calculated                                                                                                                                                                    |

*Our web collection on [statistics for biologists](#) contains articles on many of the points above.*

### Software and code

Policy information about [availability of computer code](#)

Data collection

Data analysis

For manuscripts utilizing custom algorithms or software that are central to the research but not yet described in published literature, software must be made available to editors and reviewers. We strongly encourage code deposition in a community repository (e.g. GitHub). See the Nature Portfolio [guidelines for submitting code & software](#) for further information.

### Data

Policy information about [availability of data](#)

All manuscripts must include a [data availability statement](#). This statement should provide the following information, where applicable:

- Accession codes, unique identifiers, or web links for publicly available datasets
- A description of any restrictions on data availability
- For clinical datasets or third party data, please ensure that the statement adheres to our [policy](#)

De-identified data are available on reasonable request, and after signing of a data transfer agreement with Melanoma Institute Australia. Requests for data sharing can be made to the corresponding author, Georgina V Long, including a research proposal that must be approved by the principal investigators of the three participating centres. The Background and Patient Information sections of the study protocol are provided in the Supplementary Information.

## Research involving human participants, their data, or biological material

Policy information about studies with [human participants or human data](#). See also policy information about [sex, gender \(identity/presentation\), and sexual orientation](#) and [race, ethnicity and racism](#).

|                                                                    |                                                                                                                                                                                                                                                                     |
|--------------------------------------------------------------------|---------------------------------------------------------------------------------------------------------------------------------------------------------------------------------------------------------------------------------------------------------------------|
| Reporting on sex and gender                                        | We report self-reported biological sex in the study, and did not collect or report gender data.                                                                                                                                                                     |
| Reporting on race, ethnicity, or other socially relevant groupings | We did not collect or report on race or ethnicity.                                                                                                                                                                                                                  |
| Population characteristics                                         | Population characteristics are available in Table 1.                                                                                                                                                                                                                |
| Recruitment                                                        | Participants were recruited through the three participating sites in Australia (Westmead Hospital and Melanoma Institute Australia in NSW and the Peter MacCallum Cancer Centre in VIC).                                                                            |
| Ethics oversight                                                   | The study was performed in accordance with the Declaration of Helsinki and Good Clinical Practice guidelines. Patients provided written informed consent. The study protocol was approved by the human research ethics committee at each participating institution. |

Note that full information on the approval of the study protocol must also be provided in the manuscript.

## Field-specific reporting

Please select the one below that is the best fit for your research. If you are not sure, read the appropriate sections before making your selection.

Life sciences  Behavioural & social sciences  Ecological, evolutionary & environmental sciences

For a reference copy of the document with all sections, see [nature.com/documents/nr-reporting-summary-flat.pdf](https://nature.com/documents/nr-reporting-summary-flat.pdf)

## Life sciences study design

All studies must disclose on these points even when the disclosure is negative.

|                 |                                                                                                                                                                                                                                                                                                                                                                                                                                                                                                                                                               |
|-----------------|---------------------------------------------------------------------------------------------------------------------------------------------------------------------------------------------------------------------------------------------------------------------------------------------------------------------------------------------------------------------------------------------------------------------------------------------------------------------------------------------------------------------------------------------------------------|
| Sample size     | The sample size of 20 patients per arm (N=60) was calculated to determine whether the pathological response rate was $\leq 5\%$ or $\geq 20\%$ . If the number of pathological responses was three or more, the hypothesis that pathological response rate $\leq 5\%$ was rejected with a target error rate of 0.080 and an actual error rate of 0.075. If the number of pathological responses was two or less, the hypothesis that pathological response rate $\geq 20\%$ was rejected with a target error rate of 0.210 and an actual error rate of 0.206. |
| Data exclusions | All patients who enrolled in the study (N=60) were included in the analysis.                                                                                                                                                                                                                                                                                                                                                                                                                                                                                  |
| Replication     | No experiments were performed requiring replication.                                                                                                                                                                                                                                                                                                                                                                                                                                                                                                          |
| Randomization   | Patients were randomised in a 1:1:1 ratio via a web-based system in permuted blocks (block sizes 6 and 9) and stratified by BRAF V600E versus non-BRAF V600E (i.e., V600K, V600R, V600D, V600M) mutation.                                                                                                                                                                                                                                                                                                                                                     |
| Blinding        | The study was open-label.                                                                                                                                                                                                                                                                                                                                                                                                                                                                                                                                     |

## Reporting for specific materials, systems and methods

We require information from authors about some types of materials, experimental systems and methods used in many studies. Here, indicate whether each material, system or method listed is relevant to your study. If you are not sure if a list item applies to your research, read the appropriate section before selecting a response.

### Materials & experimental systems

|                                     |                                                        |
|-------------------------------------|--------------------------------------------------------|
| n/a                                 | Involved in the study                                  |
| <input checked="" type="checkbox"/> | <input type="checkbox"/> Antibodies                    |
| <input checked="" type="checkbox"/> | <input type="checkbox"/> Eukaryotic cell lines         |
| <input checked="" type="checkbox"/> | <input type="checkbox"/> Palaeontology and archaeology |
| <input checked="" type="checkbox"/> | <input type="checkbox"/> Animals and other organisms   |
| <input type="checkbox"/>            | <input checked="" type="checkbox"/> Clinical data      |
| <input checked="" type="checkbox"/> | <input type="checkbox"/> Dual use research of concern  |
| <input checked="" type="checkbox"/> | <input type="checkbox"/> Plants                        |

### Methods

|                                     |                                                 |
|-------------------------------------|-------------------------------------------------|
| n/a                                 | Involved in the study                           |
| <input checked="" type="checkbox"/> | <input type="checkbox"/> ChIP-seq               |
| <input checked="" type="checkbox"/> | <input type="checkbox"/> Flow cytometry         |
| <input checked="" type="checkbox"/> | <input type="checkbox"/> MRI-based neuroimaging |

## Clinical data

Policy information about [clinical studies](#)

All manuscripts should comply with the ICMJE [guidelines for publication of clinical research](#) and a completed [CONSORT checklist](#) must be included with all submissions.

|                             |                                                                                                                                                                                                                                                                                                                                                                                                                                                                                                                                                                                                                                                                                                                                                                                                                                                                                                                                                                                                                                                                                                                                                                                                                                                                                                                                                                                                                                                                                                                                                                                                                                                                                                                                                                                                                                                                                                                                                                                                                                                                                                                                                                                                                                                                                                                                                                                                                                                                                                                  |
|-----------------------------|------------------------------------------------------------------------------------------------------------------------------------------------------------------------------------------------------------------------------------------------------------------------------------------------------------------------------------------------------------------------------------------------------------------------------------------------------------------------------------------------------------------------------------------------------------------------------------------------------------------------------------------------------------------------------------------------------------------------------------------------------------------------------------------------------------------------------------------------------------------------------------------------------------------------------------------------------------------------------------------------------------------------------------------------------------------------------------------------------------------------------------------------------------------------------------------------------------------------------------------------------------------------------------------------------------------------------------------------------------------------------------------------------------------------------------------------------------------------------------------------------------------------------------------------------------------------------------------------------------------------------------------------------------------------------------------------------------------------------------------------------------------------------------------------------------------------------------------------------------------------------------------------------------------------------------------------------------------------------------------------------------------------------------------------------------------------------------------------------------------------------------------------------------------------------------------------------------------------------------------------------------------------------------------------------------------------------------------------------------------------------------------------------------------------------------------------------------------------------------------------------------------|
| Clinical trial registration | ClinicalTrials.gov: NCT02858921                                                                                                                                                                                                                                                                                                                                                                                                                                                                                                                                                                                                                                                                                                                                                                                                                                                                                                                                                                                                                                                                                                                                                                                                                                                                                                                                                                                                                                                                                                                                                                                                                                                                                                                                                                                                                                                                                                                                                                                                                                                                                                                                                                                                                                                                                                                                                                                                                                                                                  |
| Study protocol              | Key sections of the protocol are available in the Supplementary Information file.                                                                                                                                                                                                                                                                                                                                                                                                                                                                                                                                                                                                                                                                                                                                                                                                                                                                                                                                                                                                                                                                                                                                                                                                                                                                                                                                                                                                                                                                                                                                                                                                                                                                                                                                                                                                                                                                                                                                                                                                                                                                                                                                                                                                                                                                                                                                                                                                                                |
| Data collection             | Data were collected by the principal investigators of the trials.                                                                                                                                                                                                                                                                                                                                                                                                                                                                                                                                                                                                                                                                                                                                                                                                                                                                                                                                                                                                                                                                                                                                                                                                                                                                                                                                                                                                                                                                                                                                                                                                                                                                                                                                                                                                                                                                                                                                                                                                                                                                                                                                                                                                                                                                                                                                                                                                                                                |
| Outcomes                    | <p>Primary outcomes:</p> <ul style="list-style-type: none"><li>- Pathological response rate (complete pathological response [pCR] + near-pCR + partial pathological response) (Week 6)</li><li>- pCR rate (Week 6)</li></ul> <p>Secondary outcomes:</p> <ul style="list-style-type: none"><li>- Objective clinical (RECIST v1.1) response rate (Week 6)</li><li>- Recurrence-free survival (up to 5 years)</li><li>- Event-free survival (up to 5 years)</li><li>- Treatment-free survival (up to 5 years)</li><li>- Overall survival (up to 5 years)</li></ul> <p>Surgical outcomes:</p> <ul style="list-style-type: none"><li>- Incidence of post-operative infection (Week 6)</li><li>- Incidence of post-operative seroma (Week 6)</li><li>- Duration of post-operative wound drainage time (Week 6)</li><li>- Incidence of post-operative bleeding requiring return to theatre or transfusion (Week 6)</li><li>- Resectability assessment (baseline to Week 6)</li></ul> <p>Treatment-emergent adverse events (to Week 52)</p> <p>Tissue and liquid biopsy analysis:</p> <ul style="list-style-type: none"><li>- Characterisation of the immunophenotype of tumour infiltrating cells in melanoma tissue (baseline, Week 1, Week 2, Week 6)</li><li>- Description of the morphological assessment of melanoma tissue (baseline, Week 1, Week 2, Week 6)</li><li>- Description of the RNA expression profile of melanoma tumour (baseline, Week 1, Week 2, Week 6)</li><li>- Measurement of leucocyte subpopulations in peripheral blood (baseline, Week 1, Week 2, Week 6)</li><li>- Measurement of circulating tumour DNA (baseline, Week 1, Week 2, Week 6)</li></ul> <p>Exploratory outcomes:</p> <ul style="list-style-type: none"><li>- Concordance of metabolic response (FDG PET) measured by pathological response</li><li>- Concordance of metabolic response measured by RECIST v1.1 response</li><li>- Concordance of pathological response measured by RECIST v1.1 response</li><li>- Concordance of metabolic response (FDG PET) with RECIST v1.1 response at relapse</li><li>- Concordance of immune-related response criteria (irRC) with RECIST v1.1 response</li><li>- Correlation of the gut microbiome with RECIST v1.1 response to immunotherapy</li><li>- Characterisation of the bacterial diversity and composition in stool samples</li><li>- Characterisation of self-reported dietary habits (including use of oral probiotics) and correlation with the gut microbiome</li></ul> |
